# Supplementary material for: Populations of the coral species Montastraea cavernosa on the Belize Barrier Reef lack vertical connectivity
Source: PubMed Central journal article supplement (PMC6510931; doi:10.1038/s41598-019-43479-x), 2019-05-10
Supplement: 41598_2019_43479_MOESM1_ESM.pdf [file 41598_2019_43479_MOESM1_ESM.pdf]

## Populations of the coral species *Montastraea cavernosa* on the Belize Barrier Reef lack vertical connectivity

Ryan J. Eckert, Michael S. Studivan, and Joshua D. Voss

### Supplementary Information

Supplementary Table S1. *Montastraea cavernosa* triplex microsatellite loci primer sequences<sup>1,2</sup>. Allele size ranges listed include universal tail lengths<sup>3</sup>.

| Locus | Motif                                                      | Primer sequence (5'-3')                                           | Tail | Tail sequence (5'-3')  | Allele size w/ tail (bp) | Locus missing rate | Plex |
|-------|------------------------------------------------------------|-------------------------------------------------------------------|------|------------------------|--------------------------|--------------------|------|
| MC29  | (AAAC) <sub>7</sub>                                        | F:CAGGACCAGGCTACCGTGCTCCTTGGTACCCCTACAA<br>R:GGTGAAGAAGCAGCCATTGG | C    | NED-CAGGACCAGGCTACCGTG | 173–212                  | 0.00%              | 1    |
| MC41  | (GGTA)<br>imperfect                                        | F:GCCTCCCTCGCGCCAAATTACGCAACACTGTGCA<br>R:TCGACTGACCGAAGTACCT     | A    | 6FAM-GCCTCCCTCGCGCCA   | 359–463                  | 0.84%              | 1    |
| MC49  | (TGT) <sub>10</sub>                                        | F:GCCTTGCCAGCCCGCATTCCTCCAGTGATGTACCT<br>R:CTGAGTTCCTGCCATTAGG    | B    | VIC-GCCTTGCCAGCCCGC    | 207–399                  | 1.67%              | 1    |
| MC46  | (TTTTGT)<br>imperfect                                      | F:CAGGACCAGGCTACCGTGCGGTGTAGCTCTAGCAGGA<br>R:ACTGAGTCGCAGCATTTGG  | C    | NED-CAGGACCAGGCTACCGTG | 142–181                  | 0.00%              | 2    |
| MC65  | (TTTGGT) <sub>6</sub>                                      | F:GCCTCCCTCGCGCCATTTGTGATTGGCCAGGGTG<br>R:TTGTGCTGTGAAGCATGAT     | A    | 6FAM-GCCTCCCTCGCGCCA   | 127–187                  | 0.00%              | 2    |
| MC97  | (ACAA) <sub>6</sub><br>ACAG<br>(ACAA)                      | F:GCCTTGCCAGCCCGCACATGTGGCCTTGTTACCA<br>R:CGAACATCAGTGACAACCT     | B    | VIC-GCCTTGCCAGCCCGC    | 178–202                  | 1.26%              | 2    |
| MC4   | (TTA) <sub>7</sub> T<br>(TTA) <sub>2</sub>                 | F:CAGGACCAGGCTACCGTGACGATCAAGACTCCAACGA<br>R:GCTCTTCGTGAACACTGAGG | C    | NED-CAGGACCAGGCTACCGTG | 115–248                  | 5.02%              | 3    |
| MC18  | (AAT) <sub>2</sub> TAT<br>(AAT) <sub>9</sub>               | F:GCCTCCCTCGCGCCAGGAGAACTGGATAACCATGTC<br>R:TATGGTCCTGGGACAACCT   | A    | 6FAM-GCCTCCCTCGCGCCA   | 233–275                  | 4.18%              | 3    |
| MC114 | (TTG) <sub>10</sub><br>[15bp insert]<br>(TTG) <sub>6</sub> | F:GCCTTGCCAGCCCGCACTGTAGATCGAGGCGTTTC<br>R:TCTGTTCTCTGACTCTTTCG   | B    | VIC-GCCTTGCCAGCCCGC    | 167–245                  | 0.84 %             | 3    |

Supplementary Table S2. Summary of genetic diversity statistics across loci by population.  $n_g$ , number of unique multi-locus genotypes with amplified alleles;  $n_a$ , number of alleles;  $H_o$ , observed heterozygosity;  $H_e$ , expected heterozygosity;  $pHWE$ ,  $FDR$ -corrected  $p$ -value for tests of Hardy-Weinberg equilibrium (HWE; insignificant tests shown as ns).

| Site              | Depth (m) | Statistic | MC4   | MC18             | MC29  | MC41  | MC46  | MC49  | MC65  | MC97  | MC114 |    |
|-------------------|-----------|-----------|-------|------------------|-------|-------|-------|-------|-------|-------|-------|----|
| Tobacco Reef (TR) | 10        | $n_g$     | 15    | 15               | 15    | 15    | 15    | 15    | 15    | 15    | 15    |    |
|                   |           | $n_a$     | 11    | 9                | 6     | 7     | 4     | 7     | 4     | 5     | 11    |    |
|                   |           | $H_o$     | 0.733 | 0.867            | 0.8   | 0.867 | 0.533 | 0.8   | 0.4   | 0.667 | 0.867 |    |
|                   |           | $H_e$     | 0.889 | 0.86             | 0.778 | 0.731 | 0.429 | 0.747 | 0.391 | 0.696 | 0.889 |    |
|                   |           | $pHWE$    | ns    | ns               | ns    | ns    | ns    | ns    | ns    | ns    | ns    |    |
|                   |           | $n_g$     | 12    | 15               | 15    | 15    | 15    | 15    | 15    | 15    | 15    |    |
|                   | 16        | $n_a$     | 14    | 10               | 5     | 4     | 4     | 8     | 4     | 5     | 11    |    |
|                   |           | $H_o$     | 0.917 | 0.867            | 0.6   | 0.667 | 0.267 | 0.6   | 0.267 | 0.867 | 0.8   |    |
|                   |           | $H_e$     | 0.91  | 0.853            | 0.693 | 0.713 | 0.34  | 0.671 | 0.509 | 0.647 | 0.833 |    |
|                   |           | $pHWE$    | ns    | ns               | ns    | ns    | ns    | ns    | ns    | ns    | ns    |    |
|                   |           | 25        | $n_g$ | 14               | 15    | 15    | 15    | 15    | 15    | 15    | 15    | 15 |
|                   |           |           | $n_a$ | 21               | 8     | 6     | 6     | 2     | 8     | 3     | 5     | 11 |
|                   | $H_o$     |           | 0.929 | 0.333            | 0.533 | 0.6   | 0.333 | 0.667 | 0.267 | 0.733 | 0.667 |    |
|                   | $H_e$     |           | 0.941 | 0.836            | 0.72  | 0.684 | 0.358 | 0.838 | 0.238 | 0.651 | 0.88  |    |
|                   | $pHWE$    |           | ns    | <b>&lt;0.001</b> | ns    | ns    | ns    | ns    | ns    | ns    | ns    |    |
|                   | $n_g$     |           | 13    | 15               | 15    | 14    | 15    | 14    | 15    | 13    | 15    |    |
|                   | 35        | $n_a$     | 20    | 7                | 7     | 5     | 3     | 8     | 2     | 5     | 11    |    |
|                   |           | $H_o$     | 0.923 | 0.733            | 0.8   | 0.571 | 0.467 | 0.714 | 0.133 | 0.538 | 0.733 |    |
| $H_e$             |           | 0.944     | 0.778 | 0.733            | 0.651 | 0.371 | 0.809 | 0.124 | 0.642 | 0.871 |       |    |
| $pHWE$            |           | ns        | ns    | ns               | ns    | ns    | ns    | ns    | ns    | ns    |       |    |
| Raph's Wall (RW)  |           | 10        | $n_g$ | 15               | 15    | 15    | 15    | 15    | 15    | 15    | 15    | 15 |
|                   |           |           | $n_a$ | 13               | 8     | 7     | 6     | 4     | 5     | 2     | 6     | 9  |
|                   | $H_o$     |           | 0.8   | 0.733            | 0.8   | 0.667 | 0.4   | 0.467 | 0.4   | 0.6   | 0.867 |    |
|                   | $H_e$     |           | 0.882 | 0.811            | 0.722 | 0.784 | 0.42  | 0.48  | 0.444 | 0.762 | 0.853 |    |
|                   | $pHWE$    |           | ns    | ns               | ns    | ns    | ns    | ns    | ns    | ns    | ns    |    |
|                   | $n_g$     |           | 15    | 15               | 15    | 15    | 15    | 15    | 15    | 15    | 15    |    |
| 16                | $n_a$     | 15        | 8     | 6                | 5     | 5     | 6     | 4     | 5     | 10    |       |    |
|                   | $H_o$     | 0.733     | 0.6   | 0.4              | 0.533 | 0.533 | 0.467 | 0.267 | 0.8   | 1     |       |    |
|                   | $H_e$     | 0.924     | 0.811 | 0.676            | 0.72  | 0.484 | 0.589 | 0.296 | 0.707 | 0.856 |       |    |
|                   | $pHWE$    | ns        | ns    | ns               | ns    | ns    | ns    | ns    | ns    | ns    |       |    |

| Site               | Depth (m)       | Statistic      | MC4            | MC18  | MC29         | MC41  | MC46         | MC49             | MC65         | MC97  | MC114 |     |
|--------------------|-----------------|----------------|----------------|-------|--------------|-------|--------------|------------------|--------------|-------|-------|-----|
| Raph's Wall (RW)   | 25              | $n_g$          | 15             | 14    | 15           | 15    | 15           | 15               | 15           | 15    | 15    |     |
|                    |                 | $n_a$          | 19             | 7     | 8            | 5     | 3            | 9                | 4            | 6     | 11    |     |
|                    |                 | H <sub>O</sub> | 0.933          | 0.714 | 0.933        | 0.6   | 0.467        | 0.533            | 0.267        | 0.8   | 0.933 |     |
|                    |                 | H <sub>E</sub> | 0.936          | 0.783 | 0.778        | 0.682 | 0.451        | 0.816            | 0.389        | 0.718 | 0.893 |     |
|                    |                 | $p$ HWE        | ns             | ns    | ns           | ns    | ns           | ns               | ns           | ns    | ns    |     |
|                    | 35              | $n_g$          | 15             | 15    | 15           | 15    | 15           | 15               | 15           | 15    | 14    | 15  |
|                    |                 | $n_a$          | 19             | 8     | 6            | 5     | 3            | 8                | 4            | 5     | 10    |     |
|                    |                 | H <sub>O</sub> | 0.8            | 0.4   | 0.8          | 0.4   | 0.267        | 0.267            | 0.533        | 0.929 | 0.8   |     |
|                    |                 | H <sub>E</sub> | 0.936          | 0.813 | 0.787        | 0.509 | 0.331        | 0.751            | 0.527        | 0.742 | 0.856 |     |
|                    |                 | $p$ HWE        | ns             | ns    | ns           | ns    | ns           | <b>&lt;0.001</b> | ns           | ns    | ns    |     |
|                    | South Reef (SR) | 10             | $n_g$          | 14    | 15           | 16    | 16           | 16               | 16           | 16    | 16    | 15  |
|                    |                 |                | $n_a$          | 15    | 10           | 9     | 6            | 4                | 7            | 4     | 5     | 12  |
|                    |                 |                | H <sub>O</sub> | 0.857 | 0.933        | 0.75  | 0.75         | 0.375            | 0.5          | 0.625 | 0.938 | 0.6 |
|                    |                 |                | H <sub>E</sub> | 0.911 | 0.871        | 0.725 | 0.758        | 0.412            | 0.545        | 0.633 | 0.75  | 0.9 |
|                    |                 |                | $p$ HWE        | ns    | ns           | ns    | <b>0.002</b> | ns               | <b>0.001</b> | ns    | ns    | ns  |
| 16                 |                 | $n_g$          | 11             | 13    | 14           | 14    | 14           | 14               | 14           | 14    | 14    |     |
|                    |                 | $n_a$          | 13             | 8     | 5            | 5     | 3            | 6                | 3            | 6     | 8     |     |
|                    |                 | H <sub>O</sub> | 0.545          | 0.692 | 0.571        | 0.571 | 0.5          | 0.643            | 0.286        | 0.929 | 0.929 |     |
|                    |                 | H <sub>E</sub> | 0.897          | 0.822 | 0.61         | 0.747 | 0.439        | 0.73             | 0.36         | 0.763 | 0.832 |     |
|                    |                 | $p$ HWE        | ns             | ns    | ns           | ns    | ns           | ns               | ns           | ns    | ns    |     |
| 25                 |                 | $n_g$          | 15             | 13    | 15           | 15    | 15           | 15               | 15           | 15    | 15    | 14  |
|                    |                 | $n_a$          | 19             | 7     | 7            | 7     | 2            | 7                | 4            | 5     | 11    |     |
|                    |                 | H <sub>O</sub> | 0.733          | 0.308 | 0.733        | 0.467 | 0.133        | 0.667            | 0.4          | 0.733 | 0.857 |     |
|                    |                 | H <sub>E</sub> | 0.922          | 0.793 | 0.744        | 0.6   | 0.124        | 0.787            | 0.473        | 0.736 | 0.839 |     |
|                    |                 | $p$ HWE        | ns             | ns    | ns           | ns    | ns           | ns               | ns           | ns    | ns    |     |
| 35                 | $n_g$           | 15             | 13             | 15    | 14           | 15    | 13           | 15               | 15           | 15    |       |     |
|                    | $n_a$           | 21             | 7              | 8     | 8            | 2     | 10           | 4                | 5            | 10    |       |     |
|                    | H <sub>O</sub>  | 0.8            | 0.615          | 0.8   | 0.5          | 0.533 | 0.615        | 0.533            | 0.667        | 0.867 |       |     |
|                    | H <sub>E</sub>  | 0.942          | 0.784          | 0.784 | 0.742        | 0.444 | 0.858        | 0.42             | 0.671        | 0.849 |       |     |
|                    | $p$ HWE         | ns             | ns             | ns    | <b>0.001</b> | ns    | ns           | ns               | ns           | ns    |       |     |
| Glover's Reef (GR) | 10              | $n_g$          | 15             | 15    | 15           | 15    | 15           | 15               | 15           | 15    | 15    |     |
|                    |                 | $n_a$          | 16             | 10    | 6            | 6     | 2            | 9                | 5            | 6     | 13    |     |
|                    |                 | H <sub>O</sub> | 0.933          | 0.733 | 0.667        | 0.667 | 0.2          | 0.533            | 0.667        | 0.733 | 1     |     |
|                    |                 | H <sub>E</sub> | 0.911          | 0.869 | 0.691        | 0.724 | 0.358        | 0.776            | 0.616        | 0.598 | 0.891 |     |
|                    |                 | $p$ HWE        | ns             | ns    | ns           | ns    | ns           | ns               | ns           | ns    | ns    |     |

| Site               | Depth (m) | Statistic      | MC4   | MC18             | MC29  | MC41  | MC46  | MC49  | MC65  | MC97  | MC114 |
|--------------------|-----------|----------------|-------|------------------|-------|-------|-------|-------|-------|-------|-------|
| Glover's Reef (GR) | 16        | $n_g$          | 14    | 15               | 15    | 15    | 15    | 14    | 15    | 15    | 15    |
|                    |           | $n_a$          | 13    | 9                | 5     | 4     | 3     | 6     | 5     | 5     | 9     |
|                    |           | H <sub>O</sub> | 0.5   | 0.533            | 0.733 | 0.6   | 0.467 | 0.429 | 0.533 | 0.533 | 0.733 |
|                    |           | H <sub>E</sub> | 0.893 | 0.82             | 0.718 | 0.738 | 0.371 | 0.676 | 0.518 | 0.522 | 0.858 |
|                    |           | $p$ HWE        | ns    | ns               | ns    | ns    | ns    | ns    | ns    | ns    | ns    |
|                    | 25        | $n_g$          | 14    | 13               | 14    | 14    | 14    | 14    | 14    | 14    | 14    |
|                    |           | $n_a$          | 18    | 8                | 7     | 6     | 3     | 8     | 4     | 4     | 11    |
|                    |           | H <sub>O</sub> | 0.786 | 0.538            | 0.643 | 0.643 | 0.429 | 0.571 | 0.357 | 0.786 | 0.786 |
|                    |           | H <sub>E</sub> | 0.934 | 0.802            | 0.773 | 0.755 | 0.357 | 0.801 | 0.311 | 0.666 | 0.872 |
|                    |           | $p$ HWE        | ns    | ns               | ns    | ns    | ns    | ns    | ns    | ns    | ns    |
|                    | 35        | $n_g$          | 15    | 14               | 15    | 15    | 15    | 15    | 15    | 15    | 15    |
|                    |           | $n_a$          | 19    | 7                | 7     | 6     | 4     | 7     | 4     | 7     | 9     |
|                    |           | H <sub>O</sub> | 0.733 | 0.143            | 0.733 | 0.6   | 0.533 | 0.867 | 0.467 | 0.667 | 0.933 |
|                    |           | H <sub>E</sub> | 0.931 | 0.816            | 0.836 | 0.707 | 0.453 | 0.82  | 0.553 | 0.778 | 0.84  |
|                    |           | $p$ HWE        | ns    | <b>&lt;0.001</b> | ns    | ns    | ns    | ns    | ns    | ns    | ns    |

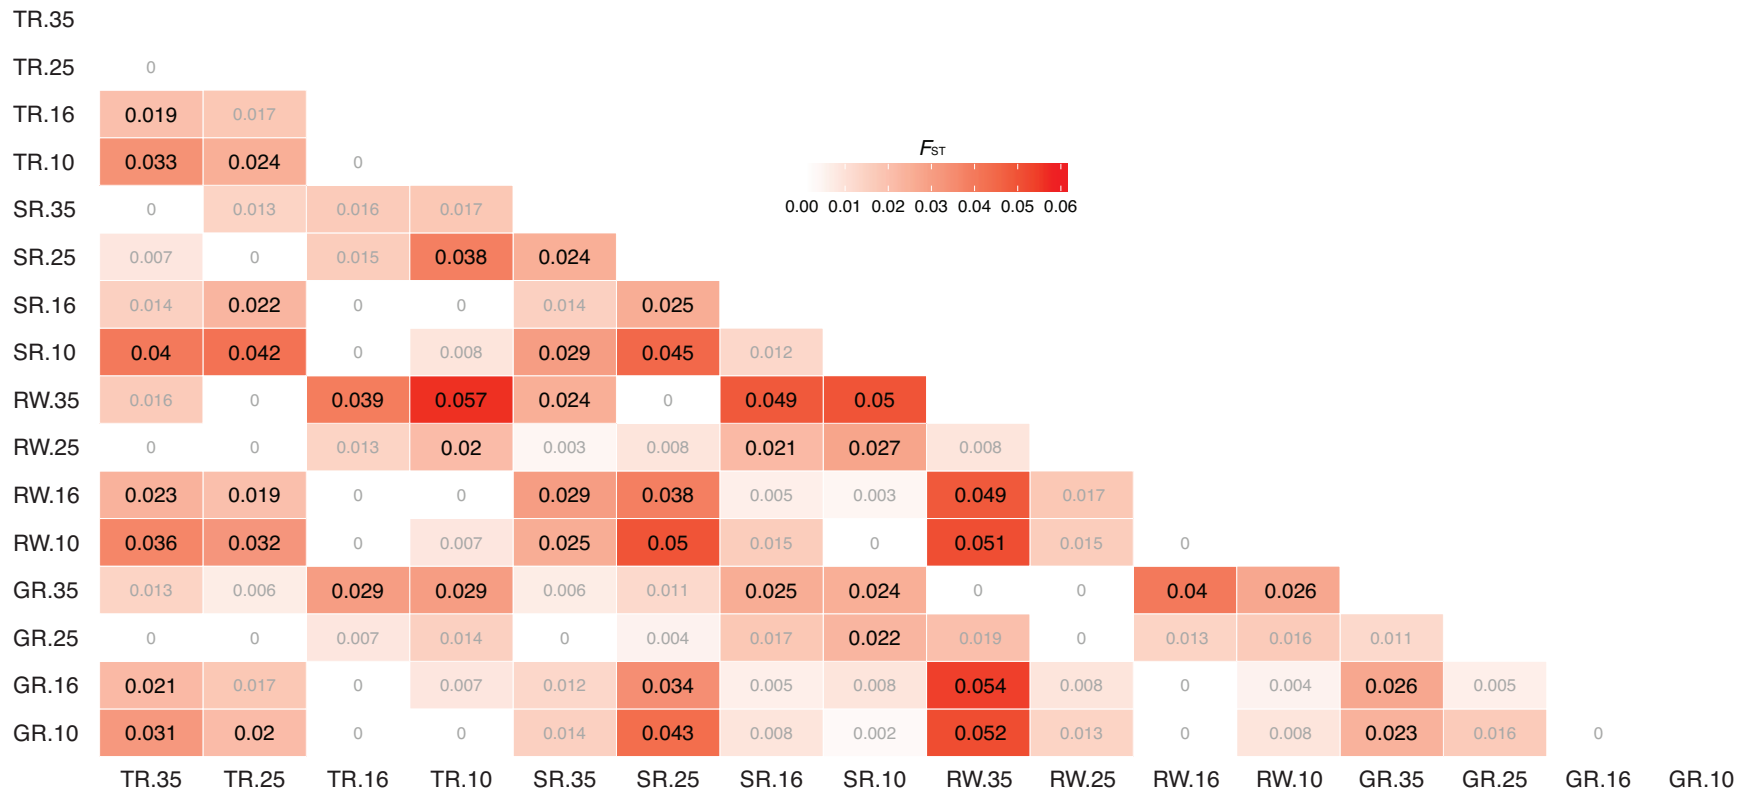

Supplementary Figure S1. Heat map showing pairwise sample population differentiation through estimation of fixation index ( $F_{ST}$ ). Values within cells are estimated  $F_{ST}$ ; intensity of red coloration corresponds to increasing  $F_{ST}$ ; bolded values denote significant differentiation between populations (after FDR correction;  $\alpha = 0.05$ ). Site abbreviations listed in Table 1.

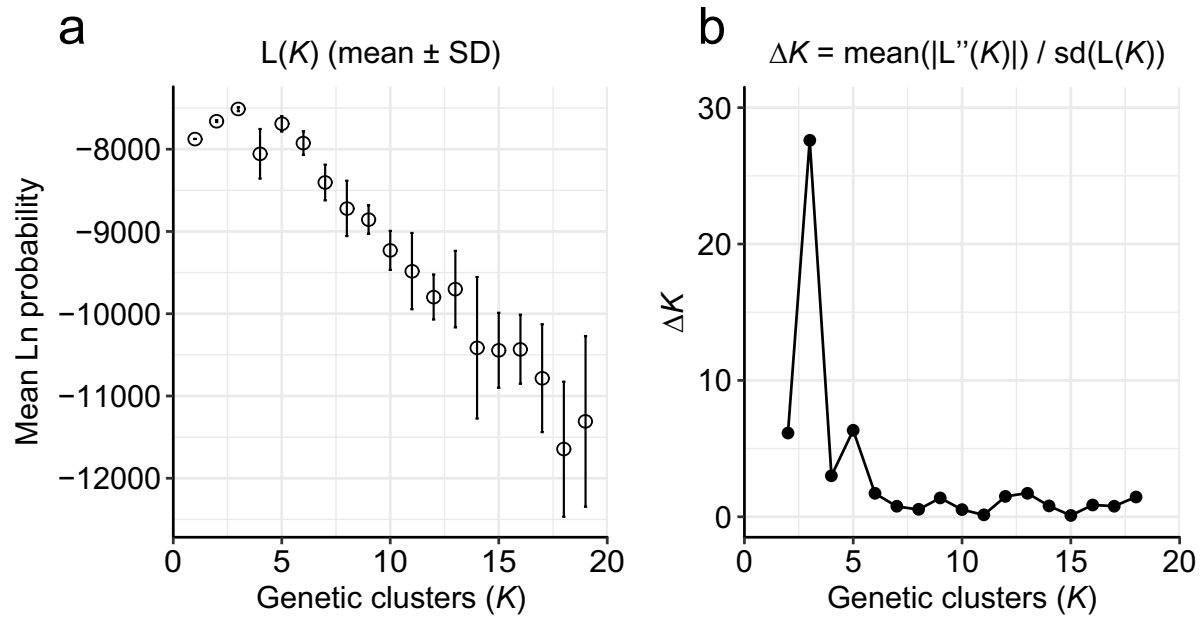

Supplementary Figure S2. Plots showing (a) mean Ln probability and (b)  $\Delta K$  values, used in selection of most likely number of genetic clusters ( $K$ ) for values of  $K = 1-19$ . Error bars represent SD of the mean.

### References

1. Serrano, X. *et al.* Geographic differences in vertical connectivity in the Caribbean coral *Montastraea cavernosa* despite high levels of horizontal connectivity at shallow depths. *Mol. Ecol.* **23**, 4226–4240, doi: 10.1111/mec.12861 (2014).
2. Studivan, M. S. & Voss, J. D. Assessment of Mesophotic Coral Ecosystem Connectivity for Proposed Expansion of a Marine Sanctuary in the Northwest Gulf of Mexico: Population Genetics. *Front. Mar. Sci.* **5**, 1–11, doi: 10.3389/fmars.2018.00152 (2018).
3. Blacket, M. J., Robin, C., Good, R. T., Lee, S. F. & Miller, A. D. Universal primers for fluorescent labelling of PCR fragments-an efficient and cost-effective approach to genotyping by fluorescence. *Mol. Ecol. Resour.* **12**, 456–463, doi: 10.1111/j.1755-0998.2011.03104.x (2012).
